# Supplementary material for: Lipocalin 2 Influences Bone and Muscle Phenotype in the MDX Mouse Model of Duchenne Muscular Dystrophy
Source: MDPI journal article supplement (doi:10.3390/ijms23020958), 2022-01-16
Supplement: s1 [file s1]

**Supplementary Table SI: Sequences of PCR primers used in this study**

| Gene          | Forward primer          | Reverse primer           |
|---------------|-------------------------|--------------------------|
| <i>Il6</i>    | GAGGATACCACTCCCAACAGACC | AAGTGCATCATCGTTGTTCATACA |
| <i>Il1b</i>   | GCCCATCCTCTGTGACTCAT    | AGGCCACAGGTATTTTGTCTG    |
| <i>Tnfa</i>   | CTCCCTTTGCAGAACTCAGG    | AGCCCCAGTCTGTATCCTT      |
| <i>Myod1</i>  | TACAGTGGCGACTCAGATGC    | TAGTAGGCGGTGTCGTAGCC     |
| <i>Myog</i>   | CCAACCCAGGAGATCATTTG    | ATATCCTCCACCGTGATGCT     |
| <i>Pax7</i>   | TGGCCAAACTGCTGTTGATTAC  | CGTCTCCAGAGGGTTTCCTG     |
| <i>Col1a1</i> | GTCCCTCTGGAAATGCTGGAC   | GACCGGGAAGACCGACCA       |
| <i>Col3a1</i> | GACCAGCAGTCCAACGTAGA    | TCTCCAAATGGGATCTGTGG     |
| <i>Gapdh</i>  | TGTGAGGGAGATGCTCAGTG    | TGTTCTACCCCCAATGTGT      |

**Supplementary Table SII: effect of Lcn2 genetic ablation on bone phenotype of 3-month-old male MDX mice.**

Values are shown as Mean±SD of the non-normalized values. Statistics were performed by One-way ANOVA.

|                   | WT BL6       | WT BL10                   | WT BL6x10                 | <i>Lcn2</i> <sup>-/-</sup> | MDX                       | MDXx <i>Lcn2</i> <sup>-/-</sup> |
|-------------------|--------------|---------------------------|---------------------------|----------------------------|---------------------------|---------------------------------|
| BV/TV%            | 17.91±2.613  | 16.03±3.706               | 13.76±1.597 <sup>\$</sup> | 13.56±1.245 <sup>\$</sup>  | 9.949±0.8516 <sup>†</sup> | 14.63±4.589 <sup>*</sup>        |
| Tb.N (1/mm)       | 4.567±0.430  | 4.515±1.107               | 3.843±0.3968              | 3.699±0.373 <sup>\$</sup>  | 2.85±0.2974 <sup>†</sup>  | 3.91±1.151 <sup>*</sup>         |
| Tb.Th (μm)        | 39.18±3.874  | 35.66±2.072 <sup>\$</sup> | 35.81±2.358 <sup>\$</sup> | 36.72±1.46 <sup>\$</sup>   | 35.3±5.383                | 37.33±3.164                     |
| Tb.Sp (μm)        | 101.0±11.3   | 112.1±22.01               | 111±17.69                 | 134.5±19.44 <sup>\$</sup>  | 153±30.87 <sup>†</sup>    | 109.7±39.25 <sup>*</sup>        |
| Ct.Th (μm)        | 90.85±4.857  | 86.95±6.467               | 83.66±14.29               | 91.38±14.24                | 88.68±18.29               | 91.46±9.035                     |
| Serum CTx (ng/ml) | 13.97±3.964  | 6.132±7.058               | 15.57±6.321 <sup>†</sup>  | 10.33±8.554                | 18.77±10.92 <sup>†</sup>  | 17.71±13.48                     |
| Oc.N/BS (1/mm)    | 2.594±0.4183 | 2.197±0.2826              | 2.548±0.669               | 2.284±0.491                | 3.414±0.7533 <sup>†</sup> | 1.236±0.557 <sup>‡*</sup>       |
| Oc.S/BS%          | 7.354±1.299  | 5.399±0.7867              | 6.982±1.466               | 7.850±3.162                | 9.204±2.383 <sup>†</sup>  | 4.987±1.241 <sup>‡*</sup>       |
| Ob.N/BS (1/mm)    | 6.52±1.833   | 4.81±1.383                | 5.826±1.681               | 2.828±0.277 <sup>\$</sup>  | 3.105±0.68                | 5.564±1.870 <sup>‡*</sup>       |
| Ob.S/BS%          | 11.08±2.533  | 8.303±2.435               | 7.418±1.019 <sup>\$</sup> | 4.704±0.738 <sup>\$</sup>  | 5.620±1.024               | 8.636±2.607 <sup>‡*</sup>       |
| ID (μm)           | 37.67±5.538  | 35±5.568                  | 32.63±2.56                | 43.5±8.093                 | 40.25±5.62                | 34.67±1.751 <sup>‡</sup>        |
| TID (μm)          | 40.83±5.529  | 36±6.928                  | 35.13±3.044               | 46.67±8.262                | 43.75±6.702               | 37.33±2.503 <sup>‡</sup>        |

p≤0.05 vs <sup>\$</sup>WT BL6; <sup>†</sup>WT BL10; <sup>‡</sup>WT BL6x10; <sup>\*</sup>MDX; <sup>‡</sup>*Lcn2*<sup>-/-</sup>

**Supplementary Table SIII: effect of Lcn2 genetic ablation on bone phenotype of 6-month-old male MDX mice.**

Values are shown as Mean±SD of the non-normalized values. Statistics were performed by One-way ANOVA.

|                | WT BL6       | WT BL10                   | WT BL6x10                 | <i>Lcn2</i> <sup>-/-</sup> | MDX                       | MDXx <i>Lcn2</i> <sup>-/-</sup> |
|----------------|--------------|---------------------------|---------------------------|----------------------------|---------------------------|---------------------------------|
| BV/TV%         | 15.6±2.931   | 10.85±0.849 <sup>\$</sup> | 10.23±1.439 <sup>\$</sup> | 8.37±2.919 <sup>\$</sup>   | 7.974±1.264 <sup>†</sup>  | 11.24±2.62 <sup>*</sup>         |
| Tb.N (1/mm)    | 3.645±0.4089 | 2.52±0.448 <sup>\$</sup>  | 2.636±0.332 <sup>\$</sup> | 2.208±0.618 <sup>\$</sup>  | 2.15±0.4369               | 3.003±0.5928 <sup>‡*</sup>      |
| Tb.Th (μm)     | 42.52±3.382  | 40.39±4.026               | 39.54±2.33                | 37.49±4.14 <sup>\$</sup>   | 36.42±4.309 <sup>†</sup>  | 37.16±2.73                      |
| Tb.Sp (μm)     | 154.9±10.82  | 136.2±40.63               | 141±20.59                 | 187.9±19.86                | 158.3±14.69 <sup>†</sup>  | 158.3±14.69 <sup>*</sup>        |
| Ct.Th (μm)     | 121.8±13.16  | 115±8.96                  | 105±11.54 <sup>\$</sup>   | 120.2±11.35                | 93.34±15.69 <sup>†</sup>  | 115.1±14.86 <sup>*</sup>        |
| Oc.N/BS (1/mm) | 1.976±0.437  | 1.612±0.1166              | 2.337±0.7568              | 2.042±0.294                | 2.622±0.8622 <sup>†</sup> | 1.732±0.5207 <sup>*</sup>       |
| Oc.S/BS%       | 7.646±1.744  | 7.358±0.8302              | 7.18±0.7617               | 7.757±1.224                | 10.92±2.543 <sup>†</sup>  | 7.665±2.2 <sup>*</sup>          |
| Ob.N/BS (1/mm) | 21.03±3.829  | 13.41±2.628 <sup>\$</sup> | 14.44±3.891 <sup>\$</sup> | 10.73±0.826 <sup>\$</sup>  | 11.52±1.884               | 16.1±3.373 <sup>‡*</sup>        |

|          |             |             |              |                           |            |                           |
|----------|-------------|-------------|--------------|---------------------------|------------|---------------------------|
| Ob.S/BS% | 15.06±1.228 | 11.84±1.161 | 11.94±0.9753 | 9.576±2.149 <sup>\$</sup> | 9.48±2.718 | 15.68±5.076 <sup>‡*</sup> |
| ID (μm)  | 32.33±3.428 | 34.67±6.028 | 33.13±7.53   | 36.67±7.607               | 45±13.54   | 32.4±5.595 <sup>*</sup>   |
| TID (μm) | 36.22±4.41  | 39.33±6.658 | 37.25±8.242  | 40.33±8.847               | 49.5±14.75 | 35.4±5.983 <sup>*</sup>   |

p≤0.05 vs <sup>\$</sup>WT BL6; <sup>†</sup>WT BL10; <sup>\*</sup>MDX; <sup>‡</sup>Lcn2<sup>-/-</sup>

**Supplementary Table SIV:** effect of Lcn2 genetic ablation on bone phenotype of 12-month-old male MDX mice. Values are shown as Mean±SD of the non-normalized values. Statistics were performed by One-way ANOVA.

|                | WT BL6       | WT BL10                   | WT BL6x10                 | Lcn2 <sup>-/-</sup>       | MDX          | MDXxLcn2 <sup>-/-</sup>   |
|----------------|--------------|---------------------------|---------------------------|---------------------------|--------------|---------------------------|
| BV/TV%         | 9.296±1.598  | 4.683±0.587 <sup>\$</sup> | 5.658±0.897 <sup>\$</sup> | 6.526±1.474 <sup>\$</sup> | 4.47±1.01    | 6.112±1.108               |
| Tb.N (1/mm)    | 2.378±0.5898 | 1.62±0.6889               | 1.96±0.4327               | 2.028±0.7454              | 2.103±0.6276 | 2.78±0.2762 <sup>‡*</sup> |
| Tb.Th (μm)     | 27.58±1.257  | 27.98±2.00                | 27.22±0.626               | 28.65±2.357               | 30.44±2.891  | 27.58±1.358               |
| Tb.Sp (μm)     | 141.3±16.69  | 200.2±76.98               | 197.1±41.14 <sup>\$</sup> | 199±36.3 <sup>\$</sup>    | 254.1±61.08  | 191.2±57.77               |
| Serum CK (U/L) | 911.4±1134   | 615±512.5                 | 329±185.3                 | 768.4±679.2               | 2709±3435    | 3624±3309 <sup>‡</sup>    |

p≤0.05 vs <sup>\$</sup>WT BL6; <sup>†</sup>WT BL6x10; <sup>\*</sup>MDX; <sup>‡</sup>Lcn2<sup>-/-</sup>

**Supplementary Table SV:** effect of Lcn2 genetic ablation on muscle phenotype of male MDX mice. Values are shown as Mean±SD of the non-normalized values. Statistics were performed by One-way ANOVA.

|                        | WT BL6       | WT BL10      | WT BL6x10                 | Lcn2 <sup>-/-</sup>       | MDX                       | MDXxLcn2 <sup>-/-</sup>   |
|------------------------|--------------|--------------|---------------------------|---------------------------|---------------------------|---------------------------|
| <i>3-month-old</i>     |              |              |                           |                           |                           |                           |
| Grip force(fold to BW) | 3.81±0.6742  | 3.544±0.335  | 3.447±0.44 <sup>\$</sup>  | 3.467±0.5709              | 2.411±0.3705 <sup>†</sup> | 3.295±0.478 <sup>*</sup>  |
| Grip force (g)         | 102.9±19.81  | 92.26±8.38   | 87.22±16.76               | 87.27±12.54 <sup>\$</sup> | 70.69±11.21 <sup>†</sup>  | 91.01±14.17 <sup>*</sup>  |
| Intact fibres%         | 99.21±0.6991 | 98.53±2.019  | 97.95±1.593               | 99.39±0.0836              | 17.3±6.85 <sup>†</sup>    | 20.37±6.29 <sup>‡</sup>   |
| Collagen area%         | 0.7544±0.308 | 1.157±0.2857 | 1.036±0.4738              | 0.9958±0.694              | 4.859±1.359 <sup>†</sup>  | 2.554±1.289 <sup>‡*</sup> |
| Serum CK (U/L)         | 427.4±311.3  | 456.8±363.2  | 1358±1494                 | 712.8±620                 | 20586±12255 <sup>†</sup>  | 5966±5406 <sup>‡*</sup>   |
| <i>6-month-old</i>     |              |              |                           |                           |                           |                           |
| Grip force(fold to BW) | 3.023±0.4854 | 2.825±0.4315 | 2.823±0.5259              | 3.18±0.5516               | 2.041±0.466 <sup>†</sup>  | 2.526±0.455 <sup>‡*</sup> |
| Grip force (g)         | 82.62±15.12  | 87.15±13.57  | 89.95±19.42               | 95.77±15.71 <sup>\$</sup> | 65.51±15.65 <sup>†</sup>  | 79.33±14.51 <sup>‡</sup>  |
| Intact fibres%         | 97.81±1.487  | 95.53±1.416  | 94.82±0.569 <sup>\$</sup> | 98.55±0.5256              | 26.9±4.081 <sup>†</sup>   | 30.51±8.72 <sup>‡</sup>   |
| Collagen area%         | 2.966±1.379  | 2.724±1.318  | 2.116±0.881               | 3.926±0.3995              | 6.864±0.4363 <sup>†</sup> | 4.229±1.175 <sup>‡*</sup> |
| Serum CK (U/L)         | 1146±1433    | 949.9±1063   | 1235±483.9                | 650.3±1031                | 2258±1648 <sup>†</sup>    | 1378±1437                 |

p≤0.05 vs <sup>\$</sup>WT BL6; <sup>†</sup>WT BL10; <sup>‡</sup>WT BL6x10; <sup>\*</sup>MDX; <sup>‡</sup>Lcn2<sup>-/-</sup>
